# Supplementary material
Source: MDPI journal article supplement (https://www.mdpi.com/2073-4441/14/6/980)
Supplement: s1 [file s1]

## Supplementary material

Table S1. Physiochemical parameters and chemical species in bulk water of the reservoir San Marcos.

|                               |                                         | Surface |         | Deep |         |
|-------------------------------|-----------------------------------------|---------|---------|------|---------|
|                               |                                         | mean    | range   | mean | range   |
| pH                            |                                         | 7.14    | 7-7.3   | 7.12 | 7.1-7.2 |
| T                             | (°C)                                    | 17.4    | 16-20   | 16.4 | 16-17   |
| ORP                           | (mV)                                    | 83.8    | 80-88   | 84   | 62-93   |
| TDS                           | (mg L <sup>-1</sup> )                   | 60      | 60-70   | 60   | 60-70   |
| Alkalinity                    | (mg CaCO <sub>3</sub> L <sup>-1</sup> ) | 15      | 14-17   | 35   | 34-36   |
| Hardness                      | (mS cm <sup>-1</sup> )                  | 38      | 33-47   | 40   | 33-54   |
| Cl <sup>-</sup>               | (mg L <sup>-1</sup> )                   | 5.04    | 4-7.5   | 5.98 | 5.7-6.2 |
| SO <sub>4</sub> <sup>2-</sup> | (mg L <sup>-1</sup> )                   | 10      | 9-11    | 12   | 11-13   |
| NO <sub>2</sub> <sup>-</sup>  | (mg L <sup>-1</sup> )                   | 1.14    | 0.4-1.8 | 0.64 | 0.2-1.1 |
| Ca <sup>2+</sup>              | (mg L <sup>-1</sup> )                   | 0.8     | 0.7-1   | 1.56 | 1.4-1.9 |
| Mg <sup>2+</sup>              | (mg L <sup>-1</sup> )                   | 0.98    | 0.9-1.1 | 0.9  | 0.8-1   |
| Na <sup>+</sup>               | (mg L <sup>-1</sup> )                   | 7.84    | 7.5-8.6 | 6.78 | 6.4-7.4 |
| K <sup>+</sup>                | (mg L <sup>-1</sup> )                   | 3.22    | 3.1-3.3 | 3.02 | 2.8-3.1 |

Table S2. Mean contents of major (% weight) and trace (mg kg<sup>-1</sup>) elements and their range in suspended sediments and dissolved phase.

|       | Surface level       |                         |                   |                       |                        | Deep level          |                         |                   |                       |                        |
|-------|---------------------|-------------------------|-------------------|-----------------------|------------------------|---------------------|-------------------------|-------------------|-----------------------|------------------------|
|       | Coarse <sub>B</sub> | Coarse <sub>sum</sub> * | Fine <sub>B</sub> | Fine <sub>sum</sub> * | Dissolved <sub>1</sub> | Coarse <sub>B</sub> | Coarse <sub>sum</sub> * | Fine <sub>B</sub> | Fine <sub>sum</sub> * | Dissolved <sup>1</sup> |
| Major |                     |                         |                   |                       |                        |                     |                         |                   |                       |                        |
| Fe    | 5.0<br>3.7-5.9      | 4.5<br>3.3-5.3          | 4.3<br>3.7-5.5    | 3.7<br>3.2-4.7        | 50.2<br>12.4-112       | 1.3<br>0.1-2.2      | 1.2<br>0.1-1.9          | 21.2<br>8.0-36.7  | 18.3<br>6.9-31.7      | 46.5<br>6.9-68.4       |
| Mg    | 0.6<br>0.5-0.8      | 0.7<br>0.5-7.6          | 0.9<br>0.8-1.1    | 1.0<br>0.8-1.2        | 490<br>340-700         | 0.2<br>0.02-0.4     | 0.2<br>0.1-0.4          | 3.0<br>0.7-7.9    | 3.1<br>0.7-8.1        | 334.5<br>88-740        |
| Ca    | 2.3<br>1.9-3.3      | 3.2<br>2.7-4.6          | 6.3<br>5.7-7.8    | 8.6<br>7.8-10.7       | 3275<br>2400-5500      | 1.2<br>0.1-2.0      | 1.7<br>0.2-2.7          | 8.3<br>2.3-20.9   | 11.3<br>3.3-28.6      | 3025<br>1400-5300      |
| Mn    | 1.3<br>1.1-1.5      | 1.2<br>1.0-1.4          | 0.6<br>0.3-0.9    | 0.6<br>0.3-0.9        | 1.1<br>0.5-1.6         | 0.3<br>0.03-0.6     | 0.3<br>0.1-0.5          | 4.3<br>2.8-5.7    | 4.1<br>2.0-5.5        | 0.4<br>0.1-1           |
| Ti    | 0.04<br>0.03-0.05   | 0.04<br>0.03-0.05       | 0.4<br>0.004-0.5  | 0.02<br>0.3-0.04      | <DL <sup>a</sup>       | 0.01<br>0.001-0.03  | 0.01<br>0.001-0.02      | 0.2<br>0.05-0.4   | 0.2<br>0.05-0.3       | <DL                    |
| Trace |                     |                         |                   |                       |                        |                     |                         |                   |                       |                        |
| Pb    | 146<br>126-172      | 130<br>112-153          | 506<br>300-803    | 438<br>260-695        | 2.5<br>1.1-5           | 70.6<br>4.5-331     | 63<br>4-117             | 667<br>191-1574   | 578<br>166-1364       | 4.6<br>2.7-6.9         |
| V     | 122<br>110-152      | 95<br>86-118            | 161<br>127-230    | 136<br>98-178         | 0.6<br>0.4-0.8         | 32.0<br>2.6-50.4    | 25<br>2-39              | 475<br>127-1046   | 401<br>106-883        | 0.5<br>0.3-0.8         |
| Ni    | 212<br>44-397       | 168<br>35-315           | 178<br>21-437     | 152<br>19-389         | 0.7<br>0.2-1.7         | 164.9<br>24.0-314   | 125<br>18-237           | 526<br>326-904    | 449<br>279-773        | 0.8<br>0.06-3          |
| Sr    | 238<br>202-280      | 293<br>248-344          | 775<br>494-1227   | 922<br>589-1464       | 28.3<br>14-38          | 100.5<br>10.6-176   | 124<br>13-216           | 725<br>208-1741   | 863<br>248-2072       | 42.5<br>20-88          |
| Cu    | 195<br>149-288      | 316<br>241-467          | 824<br>393-1388   | 1341<br>639-2259      | 4.5<br>1.8-8.7         | 8.5<br>0.7-18       | 138<br>11-292           | 320<br>130-570    | 522<br>207-912        | 3.9<br>1.6-7.6         |
| Li    | 155<br>91-331       | 223<br>132-478          | 717<br>251-1145   | 1010<br>362-1651      | 3.3<br>2-4.3           | 51.9<br>3.5-132     | 75<br>5-190             | 257<br>87-438     | 362<br>123-617        | 3.0<br>1-5.3           |
| Zn    | 448<br>359-668      | 724<br>580-1078         | 1690<br>1183-2593 | 2459<br>1791-2926     | 16.8<br>3.7-41.2       | 90.4<br>7.6-242     | 368<br>31-987           | 381<br>192-555    | 1529<br>770-2229      | 11.6<br>4.1-15.8       |

\*The total concentration was obtained from the sum of the element concentration in every fraction and averaging the mean from each sampling point.

<sup>1</sup> The concentration of elements is given in mg L<sup>-1</sup>.<sup>a</sup> DL under detection limit.



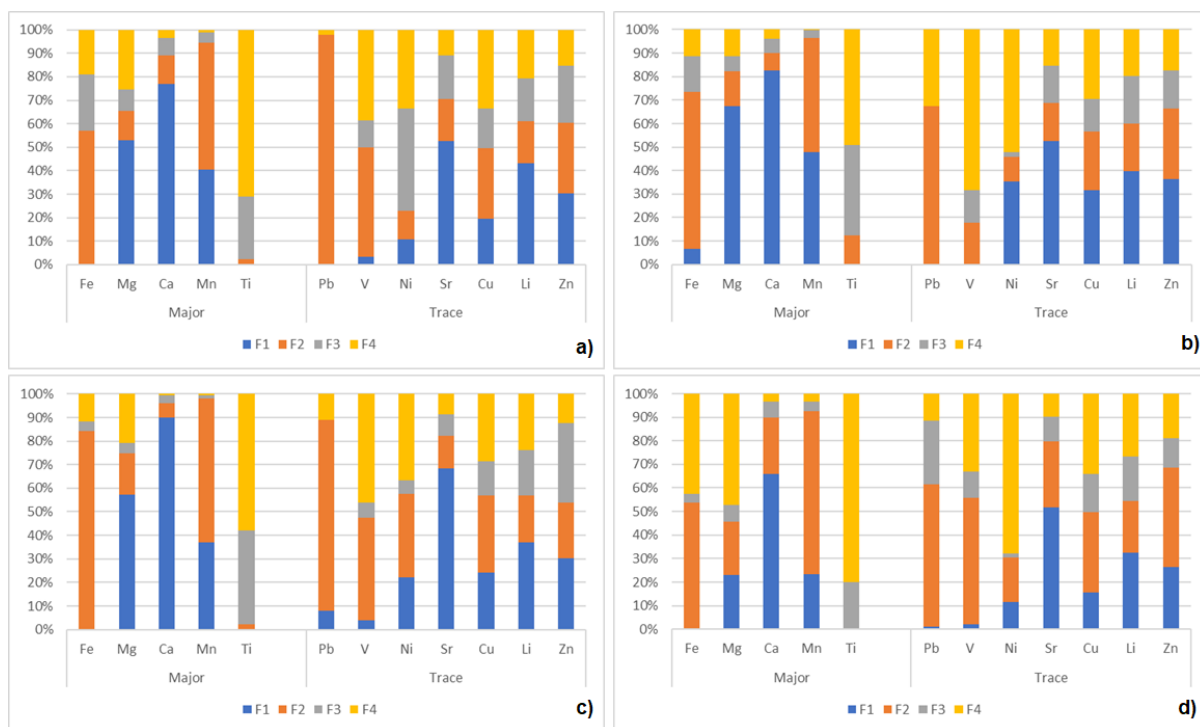

Figure S2. The metal percent by particle fractions: a) Coarse particles at surface level, b) Fine particles at the surface, c) Coarse particles at deep level, and d) Fine particles at a deep level. F1 (bioavailable fraction); F2 reduced fraction; F3 oxidized fraction; F4 residual fraction.

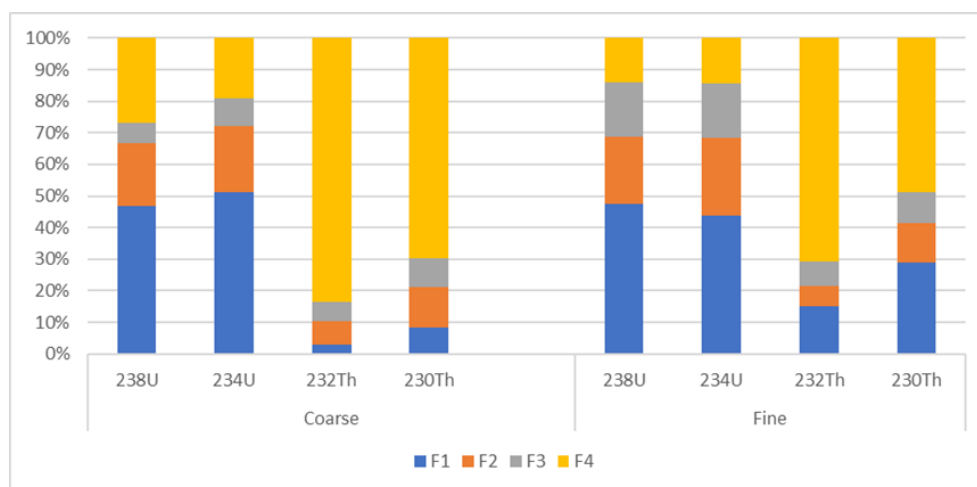

Figure S3. Isotopic U and Th percent by fractions of coarse and fine particles at a deep level. F1 (bioavailable fraction); F2 reduced fraction; F3 oxidized fraction; F4 residual fraction.
